# Supplementary material for: Modeling of Treatment Outcomes with Tofacitinib Maintenance Therapy in Patients with Ulcerative Colitis: A Post Hoc Analysis of Data from the OCTAVE Clinical Program
Source: Springer Nature journal article supplement (doi:10.1007/s12325-023-02603-0), 2023-07-31
Supplement: MOESM1 [file 25868792]

## **SUPPLEMENTARY MATERIAL**

### **Modeling of Treatment Outcomes with Tofacitinib Maintenance Therapy in Patients with Ulcerative Colitis: A Post Hoc Analysis of Data from the OCTAVE**

#### **Clinical Program**

Michael Chiorean, Marco Daperno, Charlie W. Lees, Gianluca Bonfanti, Dimitrios Soudis, Irene Modesto, J. Jasper Deuring,\* Roger A. Edwards\*

#### **Michael Chiorean**

Swedish Medical Center, Seattle, WA, USA

#### **Marco Daperno**

SC Gastroenterologia, AO Ordine Mauriziano di Torino, Torino, Italy

#### **Charlie W. Lees**

Institute of Genetics & Molecular Medicine, University of Edinburgh, and IBD UNIT, Western General Hospital, NHS Lothian, Edinburgh, UK

#### **Gianluca Bonfanti**

Engineering Ingegneria Informatica, Milan, Italy

#### **Dimitrios Soudis**

Pfizer Hellas S.A., Thessaloniki, Greece

#### **Irene Modesto**

Pfizer Inc, New York, NY, USA

#### **J. Jasper Deuring\***

Pfizer Netherlands GmbH, Rotterdam, The Netherlands

**Roger A. Edwards\***

Health Services Consulting Corporation, Boxborough, MA, USA

\*Authors have contributed equally to this work

**Correspondence:** J. Jasper Deuring, Pfizer Inc, Rivium Westlaan 142, 2909 LD Capelle aan den IJssel, the Netherlands. Email: [jasper.deuring@pfizer.com](mailto:jasper.deuring@pfizer.com)

All tables and figures in the Supplementary Material are included to support the interpretation of the data in the main text of the manuscript, and are cited in the text, where appropriate.

## SUPPLEMENTARY MATERIAL

|                                                                                                                                                                                                                                  |    |
|----------------------------------------------------------------------------------------------------------------------------------------------------------------------------------------------------------------------------------|----|
| Fig. S1 Visualization of response, as defined by a 2-point change in PMS over time, stratified by TNFi exposure among patients in OCTAVE Sustain receiving a) tofacitinib 10 mg BID, b) tofacitinib 5 mg BID, or c) placebo..... | 5  |
| Fig. S2 Visualization of response, as defined by a 3-point change in PMS over time, stratified by TNFi exposure among patients in OCTAVE Sustain receiving a) tofacitinib 10 mg BID, b) tofacitinib 5 mg BID, or c) placebo..... | 6  |
| Table S1 Definitions .....                                                                                                                                                                                                       | 7  |
| Table S2 Variables explored in the analysis from baseline to week 8 of OCTAVE Induction 1 and 2.....                                                                                                                             | 9  |
| Table S3 Variables explored in the analysis including baseline of OCTAVE Induction 1 and 2 only .....                                                                                                                            | 13 |
| Table S4 Variables explored in the hypothesis-based model .....                                                                                                                                                                  | 17 |
| Table S5 Relative importance of the variables from the logistic regression analyses of loss of responder status at week 8 of OCTAVE Sustain .....                                                                                | 18 |
| Table S6 Summary of AUROC values from LASSO logistic regression analyses of loss of responder status at week 8 of OCTAVE Sustain .....                                                                                           | 31 |
| Table S7 Summary of AUROC values from the hypothesis-based LASSO logistic regression analyses of loss of responder status at week 8 of OCTAVE Sustain.....                                                                       | 32 |
| Table S8 Summary of AUROC values from hypothesis-based logistic regression analyses predicting steroid-free remission <sup>a</sup> at week 52 of OCTAVE Sustain without applying variable selection .....                        | 33 |

|                                                                                                                                                                                                                                              |    |
|----------------------------------------------------------------------------------------------------------------------------------------------------------------------------------------------------------------------------------------------|----|
| Table S9 Relative importance of the variables from logistic regression analyses predicting steroid-free remission <sup>a</sup> at week 52 of OCTAVE sustain without applying variable selection                                              | 34 |
| Table S10 Relative importance of the variables from hypothesis-based logistic regression analyses predicting steroid-free remission <sup>a</sup> at week 52 of OCTAVE Sustain applying variable selection .....                              | 40 |
| Table S11 Summary of AUROC values from logistic regression analyses using a 10-fold cross-validation approach to predict steroid-free remission <sup>a</sup> at week 52 of OCTAVE Sustain without applying variable selection .....          | 44 |
| Table S12 Summary of AUROC values from LASSO logistic regression analyses predicting steroid-free remission <sup>a</sup> at week 52 of OCTAVE Sustain.....                                                                                   | 45 |
| Table S13 Summary of AUROC values from hypothesis-based logistic regression analyses using a 10-fold cross-validation approach to predict steroid-free remission <sup>a</sup> at week 52 of OCTAVE Sustain applying variable selection ..... | 46 |
| Table S14 Summary of AUROC values from hypothesis-based LASSO logistic regression analyses predicting steroid-free remission <sup>a</sup> at week 52 of OCTAVE Sustain.....                                                                  | 47 |
| Table S15 Relative importance of the variables from logistic regression analyses predicting delayed response at week 8 of OCTAVE Open.....                                                                                                   | 49 |
| Table S16 Summary of AUROC values from logistic regression analyses using a 10-fold cross-validation approach to predict delayed response at week 8 of OCTAVE Open .....                                                                     | 55 |
| Table S17 Summary of AUROC values from hypothesis-based logistic regression analyses using a 10-fold cross-validation approach to predict delayed response at week 8 of OCTAVE Open and applying variable selection .....                    | 56 |

**Fig. S1** Visualization of response, as defined by a 2-point change in PMS over time, stratified by TNFi exposure among patients in OCTAVE Sustain receiving **a)** tofacitinib 10 mg BID, **b)** tofacitinib 5 mg BID, or **c)** placebo.

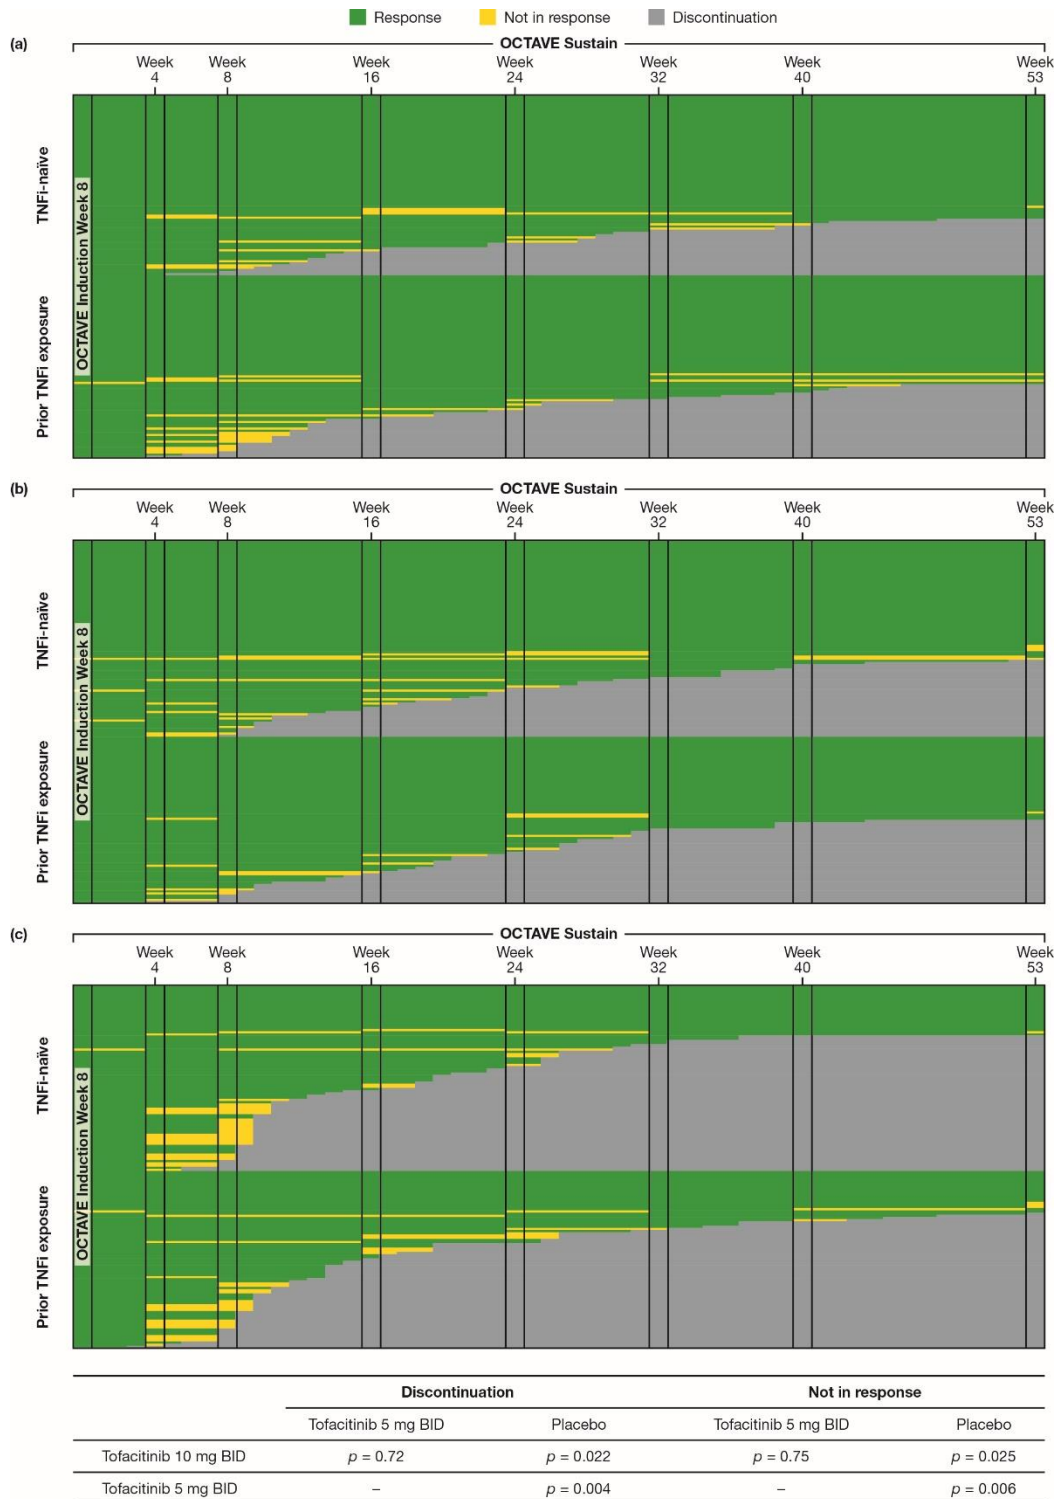

*BID* twice daily, *PMS* partial Mayo score, *TNFi* tumor necrosis factor inhibitor

**Fig. S2** Visualization of response, as defined by a 3-point change in PMS over time, stratified by TNFi exposure among patients in OCTAVE Sustain receiving a) tofacitinib 10 mg BID, b) tofacitinib 5 mg BID, or c) placebo.

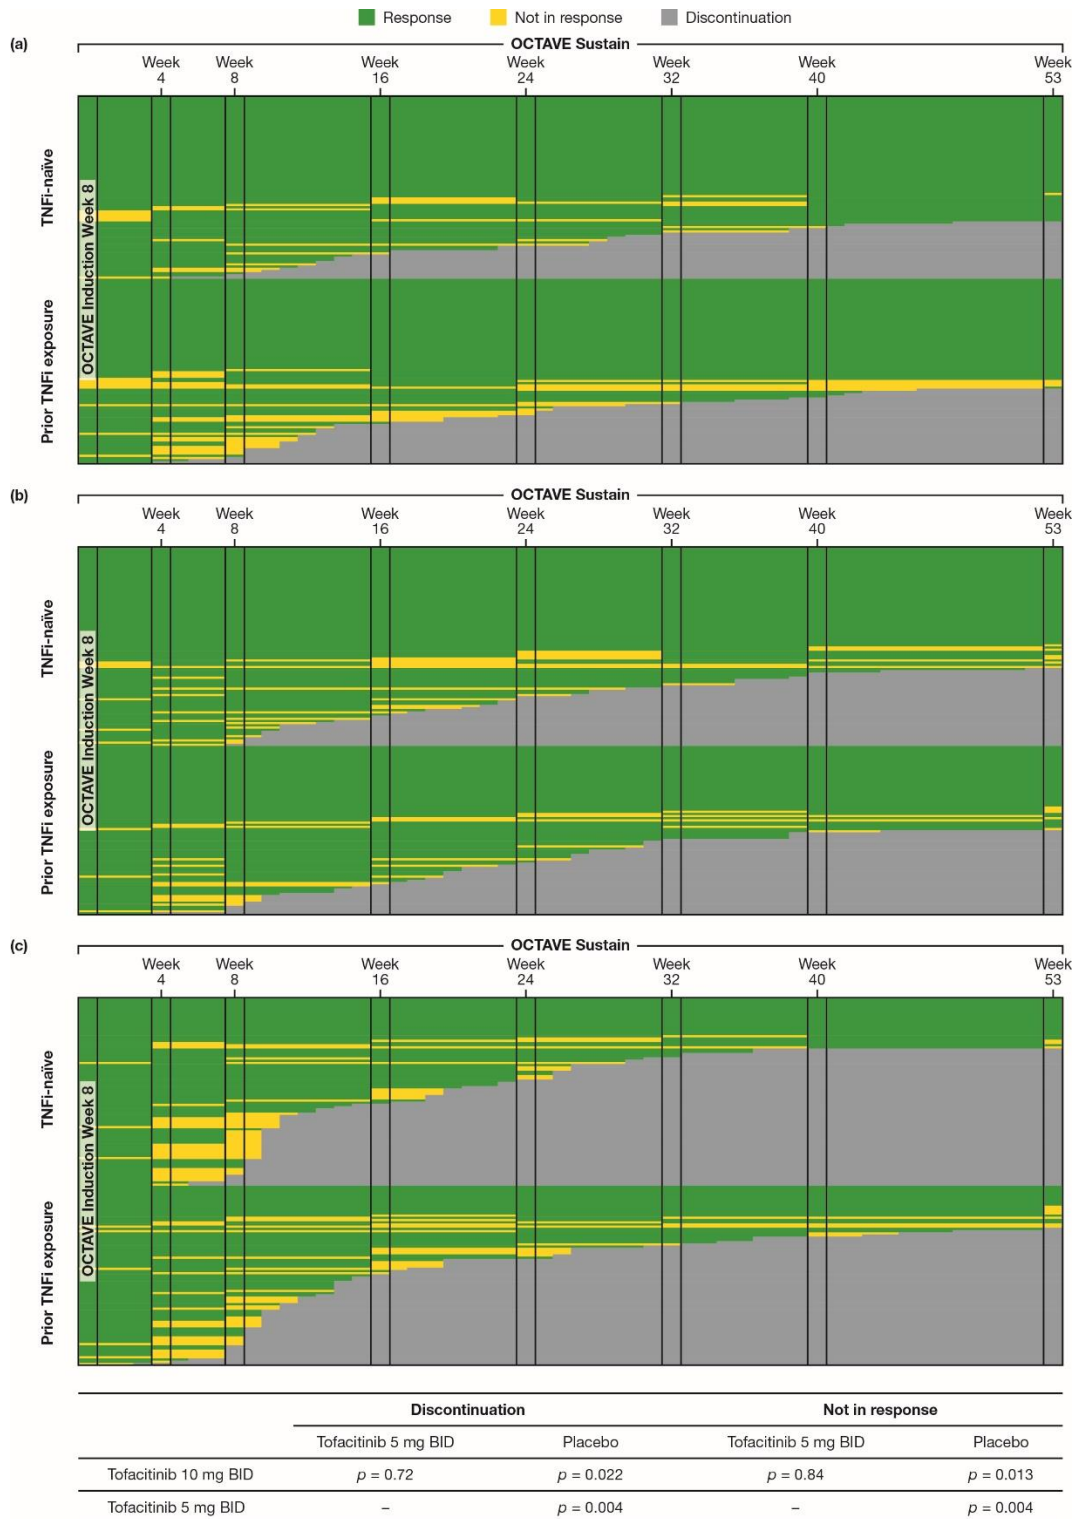

*BID* twice daily, *TNFi* tumor necrosis factor inhibitor, *PMS* partial Mayo score

**Table S1** Definitions

---

|                          |                                                                                                                                                                                                                                                                                                                                |
|--------------------------|--------------------------------------------------------------------------------------------------------------------------------------------------------------------------------------------------------------------------------------------------------------------------------------------------------------------------------|
| Total Mayo score         | <p>The total Mayo score is defined as the sum of four subscores: stool frequency, rectal bleeding, endoscopic appearance, and Physician Global Assessment [14, 15].</p> <p>Each subscore is ranked on a scale of 0–3; therefore, the total Mayo score ranges from 0–12, with higher scores indicating more severe disease.</p> |
| PMS                      | <p>The PMS includes the non-invasive components of the total Mayo score, but it excludes the endoscopic assessment.</p> <p>Each subscore is ranked on a scale of 0–3; therefore, the PMS ranges from 0–9, with higher scores indicating more severe disease.</p>                                                               |
| Response                 | <p>A 2- or 3-point decrease in PMS.</p>                                                                                                                                                                                                                                                                                        |
| Non-response             | <p>Any patient who did not achieve a 2- or 3-point decrease in PMS.</p>                                                                                                                                                                                                                                                        |
| Remission (PMS $\leq$ 1) | <p>A PMS of 0–1, while a PMS of 7–9 was considered indicative of severe disease [14].</p>                                                                                                                                                                                                                                      |

---

*Table continues on the next page*

**Table S1** Definitions (continued)

---

|                                       |                                                                                                                                                                                                                                                  |
|---------------------------------------|--------------------------------------------------------------------------------------------------------------------------------------------------------------------------------------------------------------------------------------------------|
| Steroid-free remission (PMS $\leq$ 1) | A PMS of 0–1 in the absence of corticosteroid use.<br><br>Tapering of corticosteroids was mandatory upon entry to OCTAVE Sustain; only patients who were taking steroids at baseline of OCTAVE Induction 1 and 2 were included in this analysis. |
| Baseline                              | Start of therapy in OCTAVE Induction 1 and 2.                                                                                                                                                                                                    |
| Week 8 (of OCTAVE Induction)          | Week 8 of OCTAVE Induction 1 and 2 and the start of OCTAVE Sustain for all responders in OCTAVE Induction 1 and 2.                                                                                                                               |

---

*PMS* partial Mayo score



**Table S2** Variables explored in the analysis from baseline to week 8 of OCTAVE Induction 1 and 2

---

**PMS**

Value at baseline and week 8 of induction

Monotonicity from baseline to week 8 of induction

Path length from baseline to week 8 of induction

**Partial Mayo subscores**

Stool frequency at baseline and week 8 of induction

Rectal bleeding at baseline and week 8 of induction

Physician Global Assessment at baseline and week 8 of induction

**Physical attributes having a continuous value**

Age, years

BMI, kg/m<sup>2</sup>

Duration of UC, years

**Medication use before induction**

Prior use of TNFi before induction

Prior use of immunosuppressant before induction

**Medication use during induction**

Concomitant use of 5-ASA during induction

Concomitant use of corticosteroids during induction

---

*Table continues on the next page*

**Table S2** Variables explored in the analysis from baseline to week 8 of OCTAVE Induction  
1 and 2 (continued)

---

**Medical history variables**

Blood and lymphatic system disorders

Cardiac disorders

Gastrointestinal disorders

General disorders and administration site conditions

Hepatobiliary disorders

Immune system disorders

Infections and infestations

Investigations

Metabolism and nutrition disorders

Musculoskeletal and connective tissue disorders

Nervous system disorders

Psychiatric disorders

Respiratory, thoracic, and mediastinal disorders

Skin and subcutaneous tissue disorders

Vascular disorders

Other

---

*Table continues on the next page*

**Table S2** Variables explored in the analysis from baseline to week 8 of OCTAVE Induction  
1 and 2 (continued)

---

**Vital signs values at baseline of induction**

Blood pressure category, mmHg

Pulse rate, bpm

**Laboratory variables at week 8 of induction**

Albumin, g/dL

Alkaline phosphatase, IU/L

Alanine aminotransferase, IU/L

Aspartate aminotransferase, IU/L

Basophils, %

Bicarbonate, mEq/L

Total bilirubin, mg/dL

Calcium, mg/dL

Chloride, mEq/L

Cholesterol HDL, mg/dL

Cholesterol, mg/dL

Creatine kinase, U/L

Creatinine, mg/dL

C-reactive protein, mg/L

Eosinophils, %

Gamma glutamyl transferase, IU/L

Glucose, mg/dL

---

*Table continues on the next page*

**Table S2** Variables explored in the analysis from baseline to week 8 of OCTAVE Induction 1 and 2 (continued)

---

**Laboratory variables at week 8 of induction (continued)**

Hemoglobin, g/dL

Lactate dehydrogenase, IU/L

Lymphocytes,  $10^3/\text{mm}^3$

Mean corpuscular hemoglobin, pg

Monocytes, %

Neutrophils–lymphocytes ratio

Platelets,  $10^3/\text{mm}^3$

Potassium, mEq/L

Protein, g/dL

Red blood cell distribution width,  $10^6/\text{mm}^3$

Reticulocytes, %

Sodium, mEq/L

Triglycerides, mg/dL

Uric acid, mg/dL

White blood cells,  $10^3/\text{mm}^3$

---

5-ASA 5-aminosalicylates, *BMI* body mass index, *HDL* high-density lipoprotein,

*PMS* partial Mayo score, *TNFi* tumor necrosis factor inhibitors, *UC* ulcerative colitis

**Table S3** Variables explored in the analysis including baseline of OCTAVE Induction 1 and 2 only

---

**PMS**

Value at baseline of induction

**Partial Mayo subscores**

Stool frequency at baseline of induction

Rectal bleeding at baseline of induction

Physician Global Assessment at baseline of induction

**Physical attributes having a continuous value**

Age, years

BMI, kg/m<sup>2</sup>

Duration of UC, years

**Medication use before induction**

Prior use of 5-ASA before induction

Prior use of corticosteroids before induction

Prior use of TNFi before induction

Prior use of immunosuppressant before induction

**Medical history variables**

Blood and lymphatic system disorders

Cardiac disorders

Gastrointestinal disorders

General disorders and administration site conditions

Hepatobiliary disorders

---

*Table continues on the next page*

**Table S3** Variables explored in the analysis including baseline of OCTAVE Induction 1 and 2 only (continued)

---

**Medical history variables (continued)**

Immune system disorders

Infections and infestations

Investigations

Metabolism and nutrition disorders

Musculoskeletal and connective tissue disorders

Nervous system disorders

Psychiatric disorders

Respiratory, thoracic, and mediastinal disorders

Skin and subcutaneous tissue disorders

Vascular disorders

Other

**Vital signs values at baseline of induction**

Blood pressure category, mmHg

Pulse rate, bpm

**Laboratory variables at baseline of induction**

Albumin, g/dL

Alkaline phosphatase, IU/L

Alanine aminotransferase, IU/L

Aspartate aminotransferase, IU/L

Basophils, %

---

*Table continues on the next page*

**Table S3** Variables explored in the analysis including baseline of OCTAVE Induction 1 and 2 only (continued)

---

**Laboratory variables at baseline of induction (continued)**

Bicarbonate, mEq/L

Total bilirubin, mg/dL

Calcium, mg/dL

Chloride, mEq/L

Cholesterol HDL, mg/dL

Cholesterol, mg/dL

Creatine kinase, U/L

Creatinine, mg/dL

C-reactive protein, mg/L

Eosinophils, %

Gamma glutamyl transferase, IU/L

Glucose, mg/dL

Hemoglobin, g/dL

Lactate dehydrogenase, IU/L

Lymphocytes,  $10^3/\text{mm}^3$

Mean corpuscular hemoglobin, pg

Monocytes, %

Neutrophils–lymphocytes ratio

Platelets,  $10^3/\text{mm}^3$

Potassium, mEq/L

---

*Table continues on the next page*

**Table S3** Variables explored in the analysis including baseline of OCTAVE Induction 1 and 2 only (continued)

---

**Laboratory variables at baseline of induction (continued)**

Protein, g/dL

Red blood cell distribution width,  $10^6/\text{mm}^3$

Reticulocytes, %

Sodium, mEq/L

Triglycerides, mg/dL

Uric acid, mg/dL

White blood cells,  $10^3/\text{mm}^3$

---

5-ASA 5-aminosalicylates, *BMI* body mass index, *HDL* high-density lipoprotein,

*PMS* partial Mayo score, *TNFi* tumor necrosis factor inhibitors, *UC* ulcerative colitis



**Table S4** Variables explored in the hypothesis-based model

---

**Total Mayo score**

**PMS**

**Partial Mayo subscores**

Stool frequency

Rectal bleeding

Physician Global Assessment

**Medication use before induction**

Prior use of steroids before induction

Prior use of TNFi before induction

**Medical history variables**

Gastrointestinal disorders

Immune system disorders

Musculoskeletal and connective tissue disorders

Skin and subcutaneous tissue disorders

**Laboratory variables at baseline of induction**

Albumin, g/dL

Cholesterol HDL, mg/dL

Cholesterol, mg/dL

C-reactive protein, mg/L

---

Variables included in the hypothesis-based model were selected based on information extracted from the current literature and the expert opinion of the authors. *HDL* high-density lipoprotein, *PMS* partial Mayo score, *TNFi* tumor necrosis factor inhibitors

**Table S5** Relative importance of the variables from the logistic regression analyses of loss of responder status at week 8 of OCTAVE Sustain

| Whole set of patients                       |                                             | Testing set of training-testing split         |                                             |
|---------------------------------------------|---------------------------------------------|-----------------------------------------------|---------------------------------------------|
| <b>2-point PMS loss of responder status</b> |                                             |                                               |                                             |
| <b>Tofacitinib 10 mg BID</b>                |                                             |                                               |                                             |
| AUROC value                                 | 0.72                                        |                                               | 0.56                                        |
| (baseline only)                             |                                             |                                               |                                             |
|                                             | <b>OR point estimates<br/>(95% Wald CI)</b> |                                               | <b>OR point estimates<br/>(95% Wald CI)</b> |
| Age, years                                  | 0.954<br>(0.921–0.987)                      | Age, years                                    | 0.909<br>(0.855–0.967)                      |
| Monocytes, %                                | 3.743<br>(1.074–13.048)                     | Medical history of investigations, 1 vs 0     | 11.059<br>(1.538–79.527)                    |
| Neutrophils–lymphocytes ratio               | 1.136<br>(1.016–1.270)                      | Medical history of vascular disorders, 1 vs 0 | 10.872<br>(1.114–106.050)                   |
| Total bilirubin, mg/dL                      | 0.047<br>(0.004–0.530)                      | Monocytes, %                                  | 6.923<br>(1.345–35.623)                     |

*Table continues on the next page*

**Table S5** Relative importance of the variables from the logistic regression analyses of loss of responder status at week 8 of OCTAVE Sustain

(continued)

|                                  |                        |
|----------------------------------|------------------------|
| Platelets, $10^3/\text{mm}^3$    | 1.006<br>(1.001–1.012) |
| Neutrophils–lymphocytes<br>ratio | 1.246<br>(1.065–1.457) |

---

*Table continues on the next page*

**Table S5** Relative importance of the variables from the logistic regression analyses of loss of responder status at week 8 of OCTAVE Sustain

(continued)

| AUROC value          | 0.83                                        |                                             | 0.70                                        |                                             |
|----------------------|---------------------------------------------|---------------------------------------------|---------------------------------------------|---------------------------------------------|
| (baseline to week 8) |                                             | <b>OR point estimates<br/>(95% Wald CI)</b> |                                             | <b>OR point estimates<br/>(95% Wald CI)</b> |
|                      | PMS                                         | 1.606<br>(1.070–2.410)                      | Concomitant use of corticosteroids, 1 vs 0  | 5.284<br>(1.855–15.051)                     |
|                      | Age, years                                  | 0.952<br>(0.914–0.991)                      | Platelets, 10 <sup>3</sup> /mm <sup>3</sup> | 1.011<br>(1.004–1.018)                      |
|                      | Concomitant use of corticosteroids, 1 vs 0  | 6.180<br>(2.406–15.871)                     |                                             |                                             |
|                      | Platelets, 10 <sup>3</sup> /mm <sup>3</sup> | 1.010<br>(1.004–1.017)                      |                                             |                                             |

*Table continues on the next page*

**Table S5** Relative importance of the variables from the logistic regression analyses of loss of responder status at week 8 of OCTAVE Sustain

(continued)

| <b>Tofacitinib 5 mg BID</b>                                                        |                                             |                                                                                                               |
|------------------------------------------------------------------------------------|---------------------------------------------|---------------------------------------------------------------------------------------------------------------|
| AUROC value                                                                        | 0.73                                        | 0.50                                                                                                          |
| (baseline only)                                                                    | <b>OR point estimates<br/>(95% Wald CI)</b> | <b>OR point estimates<br/>(95% Wald CI)</b>                                                                   |
| Prior immunosuppressant use<br>before induction, 1 vs 0                            | 4.353<br>(1.368–13.851)                     | Prior 5-ASA use before<br>induction, 1 vs 0<br>2.724<br>(1.048–7.084)                                         |
| Medical history of<br>musculoskeletal and<br>connective tissue disorder,<br>1 vs 0 | 3.854<br>(1.495–9.937)                      | Medical history of<br>musculoskeletal and<br>connective tissue disorder,<br>1 vs 0<br>3.414<br>(1.041–11.192) |
| Alanine aminotransferase,<br>IU/L                                                  | 1.024<br>(0.933–1.056)                      | Alanine aminotransferase,<br>IU/L<br>1.032<br>(1.001–1.063)                                                   |
| Aspartate aminotransferase,<br>IU/L                                                | 0.887<br>(0.816–0.965)                      | Aspartate aminotransferase,<br>IU/L<br>0.822<br>(0.733–0.921)                                                 |

*Table continues on the next page*

**Table S5** Relative importance of the variables from the logistic regression analyses of loss of responder status at week 8 of OCTAVE Sustain

(continued)

| AUROC value          | 0.84                                                 |                                             | 0.73                                                 |                                             |
|----------------------|------------------------------------------------------|---------------------------------------------|------------------------------------------------------|---------------------------------------------|
| (baseline to week 8) |                                                      | <b>OR point estimates<br/>(95% Wald CI)</b> |                                                      | <b>OR point estimates<br/>(95% Wald CI)</b> |
|                      | Concomitant use of corticosteroids, 1 vs 0           | 3.001<br>(1.231–7.318)                      | BMI, kg/m <sup>2</sup>                               | 1.197<br>(1.054–1.359)                      |
|                      | Prior immunosuppressant use before induction, 1 vs 0 | 5.248<br>(1.421–19.390)                     | Concomitant use of corticosteroids, 1 vs 0           | 8.566<br>(2.437–30.109)                     |
|                      | Albumin, g/dL                                        | 0.022<br>(0.003–0.144)                      | Prior immunosuppressant use before induction, 1 vs 0 | 6.913<br>(1.215–39.328)                     |
|                      | Chloride, mEq/L                                      | 0.812<br>(0.683–0.966)                      | Prior TNFi use before induction, 1 vs 0              | 4.886<br>(1.396–17.104)                     |
|                      | Lymphocytes, 10 <sup>3</sup> /mm <sup>3</sup>        | 1.948<br>(1.156–3.285)                      | Total bilirubin, mg/dL                               | 0.019<br>(0.002–0.209)                      |

Table continues on the next page

**Table S5** Relative importance of the variables from the logistic regression analyses of loss of responder status at week 8 of OCTAVE Sustain

(continued)

|                    |                        |
|--------------------|------------------------|
| Cholesterol, mg/dL | 0.988<br>(0.976–1.000) |
| Potassium, mEq/L   | 0.088<br>(0.012–0.618) |

---

**3-point PMS loss of responder status**

---

**Tofacitinib 10 mg BID**

---

AUROC value

0.79

0.63

(baseline only)

|            | <b>OR point estimates<br/>(95% Wald CI)</b> |
|------------|---------------------------------------------|
| Age, years | 0.929<br>(0.890–0.969)                      |

|            | <b>OR point estimates<br/>(95% Wald CI)</b> |
|------------|---------------------------------------------|
| Age, years | 0.908<br>(0.855–0.965)                      |

*Table continues on the next page*

**Table S5** Relative importance of the variables from the logistic regression analyses of loss of responder status at week 8 of OCTAVE Sustain

(continued)

|                                              |                           |                                              |                           |
|----------------------------------------------|---------------------------|----------------------------------------------|---------------------------|
| Medical history of cardiac disorders, 1 vs 0 | 14.262<br>(1.717–118.471) | Medical history of cardiac disorders, 1 vs 0 | 25.314<br>(1.864–343.755) |
| Monocytes, %                                 | 3.343<br>(0.897–12.450)   | Medical history of investigations, 1 vs 0    | 8.412<br>(0.889–79.601)   |
| Neutrophils–lymphocytes ratio                | 1.184<br>(1.037–1.352)    | Monocytes, %                                 | 6.458<br>(1.244–33.523)   |
| Platelets, 10 <sup>3</sup> /mm <sup>3</sup>  | 1.005<br>(1.000–1.010)    | Neutrophils–lymphocytes ratio                | 1.266<br>(1.074–1.492)    |
|                                              |                           | Platelets, 10 <sup>3</sup> /mm <sup>3</sup>  | 1.007<br>(1.001–1.012)    |

---

*Table continues on the next page*



**Table S5** Relative importance of the variables from the logistic regression analyses of loss of responder status at week 8 of OCTAVE Sustain

(continued)

| AUROC value                                 | 0.86                                                                                                                                                                                                                                                                                                                                                                                                                                                                                                                                                      | 0.77 |                                             |            |                        |                                            |                         |                   |                             |                |                        |                                             |                        |                                                                                                                                                                                                                                                                                                                                                                                                           |  |                                             |                                            |                         |                                             |                        |               |                        |
|---------------------------------------------|-----------------------------------------------------------------------------------------------------------------------------------------------------------------------------------------------------------------------------------------------------------------------------------------------------------------------------------------------------------------------------------------------------------------------------------------------------------------------------------------------------------------------------------------------------------|------|---------------------------------------------|------------|------------------------|--------------------------------------------|-------------------------|-------------------|-----------------------------|----------------|------------------------|---------------------------------------------|------------------------|-----------------------------------------------------------------------------------------------------------------------------------------------------------------------------------------------------------------------------------------------------------------------------------------------------------------------------------------------------------------------------------------------------------|--|---------------------------------------------|--------------------------------------------|-------------------------|---------------------------------------------|------------------------|---------------|------------------------|
| (baseline to week 8)                        | <table border="1"> <thead> <tr> <th></th> <th><b>OR point estimates<br/>(95% Wald CI)</b></th> </tr> </thead> <tbody> <tr> <td>Age, years</td> <td>0.926<br/>(0.878–0.977)</td> </tr> <tr> <td>Concomitant use of corticosteroids, 1 vs 0</td> <td>4.750<br/>(1.567–14.403)</td> </tr> <tr> <td>Creatinine, mg/dL</td> <td>135.233<br/>(3.288–&gt;999.999)</td> </tr> <tr> <td>Glucose, mg/dL</td> <td>1.057<br/>(0.999–1.119)</td> </tr> <tr> <td>Platelets, 10<sup>3</sup>/mm<sup>3</sup></td> <td>1.015<br/>(1.007–1.023)</td> </tr> </tbody> </table> |      | <b>OR point estimates<br/>(95% Wald CI)</b> | Age, years | 0.926<br>(0.878–0.977) | Concomitant use of corticosteroids, 1 vs 0 | 4.750<br>(1.567–14.403) | Creatinine, mg/dL | 135.233<br>(3.288–>999.999) | Glucose, mg/dL | 1.057<br>(0.999–1.119) | Platelets, 10 <sup>3</sup> /mm <sup>3</sup> | 1.015<br>(1.007–1.023) | <table border="1"> <thead> <tr> <th></th> <th><b>OR point estimates<br/>(95% Wald CI)</b></th> </tr> </thead> <tbody> <tr> <td>Concomitant use of corticosteroids, 1 vs 0</td> <td>4.395<br/>(1.489–12.966)</td> </tr> <tr> <td>Platelets, 10<sup>3</sup>/mm<sup>3</sup></td> <td>1.011<br/>(1.004–1.018)</td> </tr> <tr> <td>Sodium, mEq/L</td> <td>0.759<br/>(0.590–0.977)</td> </tr> </tbody> </table> |  | <b>OR point estimates<br/>(95% Wald CI)</b> | Concomitant use of corticosteroids, 1 vs 0 | 4.395<br>(1.489–12.966) | Platelets, 10 <sup>3</sup> /mm <sup>3</sup> | 1.011<br>(1.004–1.018) | Sodium, mEq/L | 0.759<br>(0.590–0.977) |
|                                             | <b>OR point estimates<br/>(95% Wald CI)</b>                                                                                                                                                                                                                                                                                                                                                                                                                                                                                                               |      |                                             |            |                        |                                            |                         |                   |                             |                |                        |                                             |                        |                                                                                                                                                                                                                                                                                                                                                                                                           |  |                                             |                                            |                         |                                             |                        |               |                        |
| Age, years                                  | 0.926<br>(0.878–0.977)                                                                                                                                                                                                                                                                                                                                                                                                                                                                                                                                    |      |                                             |            |                        |                                            |                         |                   |                             |                |                        |                                             |                        |                                                                                                                                                                                                                                                                                                                                                                                                           |  |                                             |                                            |                         |                                             |                        |               |                        |
| Concomitant use of corticosteroids, 1 vs 0  | 4.750<br>(1.567–14.403)                                                                                                                                                                                                                                                                                                                                                                                                                                                                                                                                   |      |                                             |            |                        |                                            |                         |                   |                             |                |                        |                                             |                        |                                                                                                                                                                                                                                                                                                                                                                                                           |  |                                             |                                            |                         |                                             |                        |               |                        |
| Creatinine, mg/dL                           | 135.233<br>(3.288–>999.999)                                                                                                                                                                                                                                                                                                                                                                                                                                                                                                                               |      |                                             |            |                        |                                            |                         |                   |                             |                |                        |                                             |                        |                                                                                                                                                                                                                                                                                                                                                                                                           |  |                                             |                                            |                         |                                             |                        |               |                        |
| Glucose, mg/dL                              | 1.057<br>(0.999–1.119)                                                                                                                                                                                                                                                                                                                                                                                                                                                                                                                                    |      |                                             |            |                        |                                            |                         |                   |                             |                |                        |                                             |                        |                                                                                                                                                                                                                                                                                                                                                                                                           |  |                                             |                                            |                         |                                             |                        |               |                        |
| Platelets, 10 <sup>3</sup> /mm <sup>3</sup> | 1.015<br>(1.007–1.023)                                                                                                                                                                                                                                                                                                                                                                                                                                                                                                                                    |      |                                             |            |                        |                                            |                         |                   |                             |                |                        |                                             |                        |                                                                                                                                                                                                                                                                                                                                                                                                           |  |                                             |                                            |                         |                                             |                        |               |                        |
|                                             | <b>OR point estimates<br/>(95% Wald CI)</b>                                                                                                                                                                                                                                                                                                                                                                                                                                                                                                               |      |                                             |            |                        |                                            |                         |                   |                             |                |                        |                                             |                        |                                                                                                                                                                                                                                                                                                                                                                                                           |  |                                             |                                            |                         |                                             |                        |               |                        |
| Concomitant use of corticosteroids, 1 vs 0  | 4.395<br>(1.489–12.966)                                                                                                                                                                                                                                                                                                                                                                                                                                                                                                                                   |      |                                             |            |                        |                                            |                         |                   |                             |                |                        |                                             |                        |                                                                                                                                                                                                                                                                                                                                                                                                           |  |                                             |                                            |                         |                                             |                        |               |                        |
| Platelets, 10 <sup>3</sup> /mm <sup>3</sup> | 1.011<br>(1.004–1.018)                                                                                                                                                                                                                                                                                                                                                                                                                                                                                                                                    |      |                                             |            |                        |                                            |                         |                   |                             |                |                        |                                             |                        |                                                                                                                                                                                                                                                                                                                                                                                                           |  |                                             |                                            |                         |                                             |                        |               |                        |
| Sodium, mEq/L                               | 0.759<br>(0.590–0.977)                                                                                                                                                                                                                                                                                                                                                                                                                                                                                                                                    |      |                                             |            |                        |                                            |                         |                   |                             |                |                        |                                             |                        |                                                                                                                                                                                                                                                                                                                                                                                                           |  |                                             |                                            |                         |                                             |                        |               |                        |

Table continues on the next page

**Table S5** Relative importance of the variables from the logistic regression analyses of loss of responder status at week 8 of OCTAVE Sustain

(continued)

|                  |                        |
|------------------|------------------------|
| Potassium, mEq/L | 0.139<br>(0.027–0.711) |
| Sodium, mEq/L    | 0.751<br>(0.581–0.970) |

---

*Table continues on the next page*

**Table S5** Relative importance of the variables from the logistic regression analyses of loss of responder status at week 8 of OCTAVE Sustain  
(continued)

| <b>Tofacitinib 5 mg BID</b>                             |  |                                             |                                                                       |
|---------------------------------------------------------|--|---------------------------------------------|-----------------------------------------------------------------------|
| AUROC value                                             |  | 0.77                                        | 0.44                                                                  |
| (baseline only)                                         |  | <b>OR point estimates<br/>(95% Wald CI)</b> | <b>OR point estimates<br/>(95% Wald CI)</b>                           |
| Age, years                                              |  | 0.959<br>(0.927–0.991)                      | Prior 5-ASA use before<br>induction, 1 vs 0<br>2.976<br>(1.166–7.596) |
| BMI, kg/m <sup>2</sup>                                  |  | 1.103<br>(1.011–1.204)                      | Alanine aminotransferase,<br>IU/L<br>1.029<br>(0.999–1.059)           |
| Prior immunosuppressant use<br>before induction, 1 vs 0 |  | 5.162<br>(1.494–17.837)                     | Aspartate aminotransferase,<br>IU/L<br>0.836<br>(0.750–0.933)         |

*Table continues on the next page*

**Table S5** Relative importance of the variables from the logistic regression analyses of loss of responder status at week 8 of OCTAVE Sustain

(continued)

|                                                                            |                        |
|----------------------------------------------------------------------------|------------------------|
| Medical history of musculoskeletal and connective tissue disorders, 1 vs 0 | 3.020<br>(1.102–8.275) |
| Aspartate aminotransferase, IU/L                                           | 0.936<br>(0.880–0.996) |
| Protein, g/dL                                                              | 0.418<br>(0.205–0.851) |

---

*Table continues on the next page*

**Table S5** Relative importance of the variables from the logistic regression analyses of loss of responder status at week 8 of OCTAVE Sustain

(continued)

| AUROC value          | 0.81                                                 |                                             | 0.68                                       |                                             |
|----------------------|------------------------------------------------------|---------------------------------------------|--------------------------------------------|---------------------------------------------|
| (baseline to week 8) |                                                      | <b>OR point estimates<br/>(95% Wald CI)</b> |                                            | <b>OR point estimates<br/>(95% Wald CI)</b> |
|                      | Concomitant use of corticosteroids, 1 vs 0           | 2.415<br>(1.014–5.753)                      | PMS                                        | 2.995<br>(1.440–6.227)                      |
|                      | Prior immunosuppressant use before induction, 1 vs 0 | 5.081<br>(1.438–17.957)                     | BMI, kg/m <sup>2</sup>                     | 1.305<br>(1.099–1.550)                      |
|                      | Albumin, g/dL                                        | 0.043<br>(0.008–0.244)                      | Duration of UC, years                      | 1.141<br>(1.001–1.300)                      |
|                      | Chloride, mEq/L                                      | 0.835<br>(0.706–0.987)                      | Concomitant use of corticosteroids, 1 vs 0 | 17.364<br>(3.624–83.200)                    |

*Table continues on the next page*

**Table S5** Relative importance of the variables from the logistic regression analyses of loss of responder status at week 8 of OCTAVE Sustain

(continued)

|                                 |                        |                                                         |                           |
|---------------------------------|------------------------|---------------------------------------------------------|---------------------------|
| Lymphocytes, $10^3/\text{mm}^3$ | 1.786<br>(1.077–2.963) | Prior immunosuppressant use<br>before induction, 1 vs 0 | 13.593<br>(1.159–159.497) |
|                                 |                        | Total bilirubin, mg/dL                                  | 0.016<br>(< 0.001–0.308)  |
|                                 |                        | Creatinine, mg/dL                                       | 0.003<br>(< 0.001–0.293)  |
|                                 |                        | Potassium, mEq/L                                        | 0.047<br>(0.005–0.480)    |
|                                 |                        | Neutrophils–lymphocytes<br>ratio                        | 0.731<br>(0.584–0.914)    |

---

*5-ASA* 5-aminosalicylates, *AUROC* area under the receiver operating characteristic, *BID* twice daily, *BMI* body mass index,

*CI* confidence interval, *OR* odds ratio, *PMS* partial Mayo score, *TNFi* tumor necrosis factor inhibitors, *UC* ulcerative colitis

**Table S6** Summary of AUROC values from LASSO logistic regression analyses of loss of responder status at week 8 of OCTAVE Sustain

|                                             | Testing set of training-testing split |                      | 5-fold cross-validation |                      |
|---------------------------------------------|---------------------------------------|----------------------|-------------------------|----------------------|
|                                             | AUROC value                           | AUROC value          | AUROC value             | AUROC value          |
|                                             | (baseline only)                       | (baseline to week 8) | (baseline only)         | (baseline to week 8) |
| <b>2-point PMS loss of responder status</b> |                                       |                      |                         |                      |
| Tofacitinib 10 mg BID                       | 0.60                                  | 0.54                 | 0.59                    | 0.56                 |
| Tofacitinib 5 mg BID                        | 0.50                                  | 0.50                 | 0.49                    | 0.41                 |
| <b>3-point PMS loss of responder status</b> |                                       |                      |                         |                      |
| Tofacitinib 10 mg BID                       | 0.61                                  | 0.55                 | 0.57                    | 0.57                 |
| Tofacitinib 5 mg BID                        | 0.50                                  | 0.50                 | 0.48                    | 0.49                 |

*AUROC* area under the receiver operating characteristic, *BID* twice daily, *LASSO* Least Absolute Shrinkage and Selection Operator,

*PMS* partial Mayo score





**Table S8** Summary of AUROC values from hypothesis-based logistic regression analyses predicting steroid-free remission<sup>a</sup> at week 52 of OCTAVE Sustain without applying variable selection

|                            | Testing set of training-testing set |                  | k-fold cross-validation |                  |                      |         |
|----------------------------|-------------------------------------|------------------|-------------------------|------------------|----------------------|---------|
|                            | AUROC value                         | AUROC value      | AUROC value             |                  | AUROC value          |         |
|                            | (baseline only)                     | (baseline to     | (baseline only)         |                  | (baseline to week 8) |         |
|                            |                                     | week 8)          | 5-fold                  | 10-fold          | 5-fold               | 10-fold |
|                            |                                     | cross-validation | cross-validation        | cross-validation | cross-validation     |         |
| <b>Treatments combined</b> |                                     |                  |                         |                  |                      |         |
| PMS                        | 0.69                                | 0.79             | 0.64                    | 0.64             | 0.73                 | 0.73    |
| Partial Mayo               | 0.68                                | 0.80             | 0.64                    | 0.64             | 0.72                 | 0.72    |
| subscores <sup>b</sup>     |                                     |                  |                         |                  |                      |         |
| Total Mayo score           | 0.69                                | 0.79             | 0.64                    | 0.64             | 0.71                 | 0.71    |
| Total Mayo                 | 0.68                                | 0.79             | 0.64                    | 0.64             | 0.72                 | 0.72    |
| subscores <sup>c</sup>     |                                     |                  |                         |                  |                      |         |

*AUROC* area under the receiver operating characteristic, *PMS* partial Mayo score. <sup>b</sup>Stool frequency, rectal bleeding, and Physician Global Assessment. <sup>c</sup>Stool frequency, rectal bleeding, endoscopic appearance, and Physician Global Assessment

**Table S9** Relative importance of the variables from logistic regression analyses predicting steroid-free remission<sup>a</sup> at week 52 of OCTAVE sustain without applying variable selection

| <b>Testing set of training-testing split</b> |                                             |                                                           |                                             |
|----------------------------------------------|---------------------------------------------|-----------------------------------------------------------|---------------------------------------------|
| <b>AUROC value (baseline only)</b>           |                                             | <b>AUROC value (baseline to week 8)</b>                   |                                             |
| <b>Tofacitinib 10 mg BID</b>                 |                                             | 0.75                                                      |                                             |
|                                              | 0.70                                        |                                                           |                                             |
|                                              | <b>OR point estimates<br/>(95% Wald CI)</b> |                                                           | <b>OR point estimates<br/>(95% Wald CI)</b> |
| Stool frequency subscore                     | 0.475<br>(0.249–0.907)                      | PMS                                                       | 0.293<br>(0.161–0.532)                      |
| Duration of UC, years                        | 1.125<br>(1.031–1.227)                      | Age, years                                                | 1.051<br>(1.001–1.104)                      |
| Aspartate aminotransferase,<br>IU/L          | 1.071<br>(0.991–1.158)                      | Medical history of infections<br>and infestations, 1 vs 0 | 12.929<br>(0.590–283.369)                   |

*Table continues on the next page*

**Table S9** Relative importance of the variables from logistic regression analyses predicting steroid-free remission<sup>a</sup> at week 52 of OCTAVE sustain without applying variable selection (continued)

|                                                                     |                        |                               |                            |
|---------------------------------------------------------------------|------------------------|-------------------------------|----------------------------|
| Hemoglobin, g/dL                                                    | 0.584<br>(0.416–0.820) | Basophils, %                  | < 0.001<br>(< 0.001–5.790) |
| Red blood cell distribution width, 10 <sup>6</sup> /mm <sup>3</sup> | 0.627<br>(0.480–0.820) | Bicarbonate, mEq/L            | 0.683<br>(0.530–0.881)     |
|                                                                     |                        | Lactate dehydrogenase, IU/L   | 1.023<br>(1.008–1.039)     |
|                                                                     |                        | Neutrophils–lymphocytes ratio | 0.702<br>(0.524–0.939)     |

---

*Table continues on the next page*

**Table S9** Relative importance of the variables from logistic regression analyses predicting steroid-free remission<sup>a</sup> at week 52 of OCTAVE sustain without applying variable selection (continued)

| <b>Tofacitinib 5 mg BID</b> |                                             | 0.69 | 0.71             |                                             |
|-----------------------------|---------------------------------------------|------|------------------|---------------------------------------------|
|                             | <b>OR point estimates<br/>(95% Wald CI)</b> |      |                  | <b>OR point estimates<br/>(95% Wald CI)</b> |
| Age, years                  | 1.030<br><br>(1.001–1.060)                  |      | PMS              | 0.427<br><br>(0.273–0.670)                  |
|                             |                                             |      | Glucose, mg/dL   | 1.030<br><br>(1.000–1.060)                  |
|                             |                                             |      | Potassium, mEq/L | 5.184<br><br>(1.497–17.952)                 |

*Table continues on the next page*

**Table S9** Relative importance of the variables from logistic regression analyses predicting steroid-free remission<sup>a</sup> at week 52 of OCTAVE sustain without applying variable selection (continued)

| Placebo                | 0.55                                        | 0.68                                                          |
|------------------------|---------------------------------------------|---------------------------------------------------------------|
|                        | <b>OR point estimates<br/>(95% Wald CI)</b> | <b>OR point estimates<br/>(95% Wald CI)</b>                   |
| Age, years             | 1.045<br>(1.007–1.084)                      | PMS<br>0.593<br>(0.386–0.911)                                 |
| Total bilirubin, mg/dL | 29.759<br>(2.632–337.582)                   | Age, years<br>1.045<br>(1.006–1.086)                          |
| Creatinine, mg/dL      | 0.053<br>(0.003–0.818)                      | Calcium, mg/dL<br>4.236<br>(1.321–13.577)                     |
|                        |                                             | Gamma glutamyl transferase,<br>IU/L<br>0.909<br>(0.853–0.969) |

*Table continues on the next page*

**Table S9** Relative importance of the variables from logistic regression analyses predicting steroid-free remission<sup>a</sup> at week 52 of OCTAVE sustain without applying variable selection (continued)

| Treatments combined      | 0.66                                        | 0.79                                                 |
|--------------------------|---------------------------------------------|------------------------------------------------------|
|                          | <b>OR point estimates<br/>(95% Wald CI)</b> | <b>OR point estimates<br/>(95% Wald CI)</b>          |
| Stool frequency subscore | 0.621<br>(0.449–0.857)                      | PMS<br>0.550<br>(0.441–0.686)                        |
| Age, years               | 1.029<br>(1.010–1.048)                      | Age, years<br>1.028<br>(1.009–1.048)                 |
| Hemoglobin, g/dL         | 0.747<br>(0.633–0.881)                      | Albumin, g/dL<br>2.335<br>(0.997–5.467)              |
| Protein, g/dL            | 1.713<br>(1.065–2.754)                      | Tofacitinib 10 vs 5 mg BID<br>1.300<br>(0.716–2.359) |

*Table continues on the next page*

**Table S9** Relative importance of the variables from logistic regression analyses predicting steroid-free remission<sup>a</sup> at week 52 of OCTAVE sustain without applying variable selection (continued)

|                                                                     |                        |
|---------------------------------------------------------------------|------------------------|
| Red blood cell distribution width, 10 <sup>6</sup> /mm <sup>3</sup> | 0.779<br>(0.685–0.885) |
| Tofacitinib 10 vs 5 mg BID                                          | 1.268<br>(0.711–2.261) |
| Placebo vs tofacitinib 5 mg BID                                     | 0.306<br>(0.167–0.562) |

|                                 |                        |
|---------------------------------|------------------------|
| Placebo vs tofacitinib 5 mg BID | 0.328<br>(0.176–0.609) |
|---------------------------------|------------------------|

---

*AUROC* area under the receiver operating characteristic, *BID* twice daily, *CI* confidence interval, *OR* odds ratio, *PMS* partial Mayo score, *UC* ulcerative colitis

<sup>a</sup>Steroid-free remission was defined as a PMS of 0–1 in the absence of corticosteroids

**Table S10** Relative importance of the variables from hypothesis-based logistic regression analyses predicting steroid-free remission<sup>a</sup> at week 52 of OCTAVE Sustain applying variable selection

| <b>Testing set of training-testing split</b> |                                                                                                                                                                                                  |  |                                             |     |                        |  |                                                                                                                                                                                                               |  |                                             |                  |                        |
|----------------------------------------------|--------------------------------------------------------------------------------------------------------------------------------------------------------------------------------------------------|--|---------------------------------------------|-----|------------------------|--|---------------------------------------------------------------------------------------------------------------------------------------------------------------------------------------------------------------|--|---------------------------------------------|------------------|------------------------|
| <b>AUROC value (baseline to week 8)</b>      |                                                                                                                                                                                                  |  |                                             |     |                        |  |                                                                                                                                                                                                               |  |                                             |                  |                        |
|                                              | <b>PMS</b>                                                                                                                                                                                       |  | <b>Total Mayo score</b>                     |     |                        |  |                                                                                                                                                                                                               |  |                                             |                  |                        |
| <b>Tofacitinib 10 mg BID</b>                 | 0.77                                                                                                                                                                                             |  | 0.78                                        |     |                        |  |                                                                                                                                                                                                               |  |                                             |                  |                        |
|                                              | <table border="1"> <thead> <tr> <th></th> <th><b>OR point estimates<br/>(95% Wald CI)</b></th> </tr> </thead> <tbody> <tr> <td>PMS</td> <td>0.438<br/>(0.298–0.643)</td> </tr> </tbody> </table> |  | <b>OR point estimates<br/>(95% Wald CI)</b> | PMS | 0.438<br>(0.298–0.643) |  | <table border="1"> <thead> <tr> <th></th> <th><b>OR point estimates<br/>(95% Wald CI)</b></th> </tr> </thead> <tbody> <tr> <td>Total Mayo score</td> <td>0.581<br/>(0.477–0.755)</td> </tr> </tbody> </table> |  | <b>OR point estimates<br/>(95% Wald CI)</b> | Total Mayo score | 0.581<br>(0.477–0.755) |
|                                              | <b>OR point estimates<br/>(95% Wald CI)</b>                                                                                                                                                      |  |                                             |     |                        |  |                                                                                                                                                                                                               |  |                                             |                  |                        |
| PMS                                          | 0.438<br>(0.298–0.643)                                                                                                                                                                           |  |                                             |     |                        |  |                                                                                                                                                                                                               |  |                                             |                  |                        |
|                                              | <b>OR point estimates<br/>(95% Wald CI)</b>                                                                                                                                                      |  |                                             |     |                        |  |                                                                                                                                                                                                               |  |                                             |                  |                        |
| Total Mayo score                             | 0.581<br>(0.477–0.755)                                                                                                                                                                           |  |                                             |     |                        |  |                                                                                                                                                                                                               |  |                                             |                  |                        |

*Table continues on the next page*



**Table S10** Relative importance of the variables from hypothesis-based logistic regression analyses predicting steroid-free remission<sup>a</sup> at week 52 of OCTAVE Sustain applying variable selection (continued)

| <b>Tofacitinib 5 mg BID</b> |                                             | 0.73 | 0.69                                    |                                             |
|-----------------------------|---------------------------------------------|------|-----------------------------------------|---------------------------------------------|
|                             | <b>OR point estimates<br/>(95% Wald CI)</b> |      |                                         | <b>OR point estimates<br/>(95% Wald CI)</b> |
| PMS                         | 0.542<br><br>(0.380–0.772)                  |      | Stool frequency subscore                | 0.533<br><br>(0.303–0.940)                  |
|                             |                                             |      | Physician Global Assessment<br>subscore | 0.442<br><br>(0.224–0.874)                  |

*Table continues on the next page*

**Table S10** Relative importance of the variables from hypothesis-based logistic regression analyses predicting steroid-free remission<sup>a</sup> at week 52 of OCTAVE Sustain applying variable selection (continued)

| Placebo                                                           | 0.66                                        | 0.66                                        |
|-------------------------------------------------------------------|---------------------------------------------|---------------------------------------------|
|                                                                   | <b>OR point estimates<br/>(95% Wald CI)</b> | <b>OR point estimates<br/>(95% Wald CI)</b> |
| Medical history of skin and subcutaneous tissue disorders, 1 vs 0 | 0.176<br>(0.034–0.901)                      | 0.191<br>(0.039–0.943)                      |
| Cholesterol HDL, mg/dL                                            | 1.021<br>(1.002–1.040)                      | 1.021<br>(1.002–1.040)                      |
| PMS                                                               | 0.633<br>(0.439–0.913)                      | 0.709<br>(0.550–0.914)                      |

*Table continues on the next page*

**Table S10** Relative importance of the variables from hypothesis-based logistic regression analyses predicting steroid-free remission<sup>a</sup> at week 52 of OCTAVE Sustain applying variable selection (continued)

| Treatments combined             |                                             | 0.78                            | 0.79                                        |
|---------------------------------|---------------------------------------------|---------------------------------|---------------------------------------------|
|                                 | <b>OR point estimates<br/>(95% Wald CI)</b> |                                 | <b>OR point estimates<br/>(95% Wald CI)</b> |
| PMS                             | 0.543<br>(0.443–0.667)                      | Total Mayo score                | 0.550<br>(0.445–0.681)                      |
| Tofacitinib 10 vs 5 mg BID      | 1.218<br>(0.704–2.106)                      | Flexible sigmoidoscopy findings | 1.717<br>(1.161–2.540)                      |
| Placebo vs tofacitinib 5 mg BID | 0.321<br>(0.181–0.570)                      | Tofacitinib 10 vs 5 mg BID      | 1.218<br>(0.705–2.107)                      |
|                                 |                                             | Placebo vs tofacitinib 5 mg BID | 0.321<br>(0.180–0.570)                      |

*AUROC* area under the receiver operating characteristic, *BID* twice daily, *CI* confidence interval, *HDL* high-density lipoprotein, *OR* odds ratio, *PMS* partial Mayo score. <sup>a</sup>Steroid-free remission was defined as a PMS of 0–1 in the absence of corticosteroids

**Table S11** Summary of AUROC values from logistic regression analyses using a 10-fold cross-validation approach to predict steroid-free remission<sup>a</sup> at week 52 of OCTAVE Sustain without applying variable selection

|                              | <b>10-fold cross-validation</b>    |                                         |
|------------------------------|------------------------------------|-----------------------------------------|
|                              | <b>AUROC value (baseline only)</b> | <b>AUROC value (baseline to week 8)</b> |
| <b>Tofacitinib 10 mg BID</b> | 0.60                               | 0.71                                    |
| <b>Tofacitinib 5 mg BID</b>  | 0.45                               | 0.68                                    |
| <b>Placebo</b>               | 0.49                               | 0.55                                    |
| <b>Treatments combined</b>   | 0.65                               | 0.75                                    |

*AUROC* area under the receiver operating characteristic, *BID* twice daily, *PMS* partial Mayo score

<sup>a</sup>Steroid-free remission was defined as a PMS of 0–1 in the absence of corticosteroids

**Table S12** Summary of AUROC values from LASSO logistic regression analyses predicting steroid-free remission<sup>a</sup> at week 52 of

OCTAVE Sustain

|                              | Testing set of              |                                  | k-fold cross-validation     |                          |                                  |                          |
|------------------------------|-----------------------------|----------------------------------|-----------------------------|--------------------------|----------------------------------|--------------------------|
|                              | training-testing split      |                                  | AUROC value (baseline only) |                          | AUROC value (baseline to week 8) |                          |
|                              | AUROC value (baseline only) | AUROC value (baseline to week 8) | 5-fold cross-validation     | 10-fold cross-validation | 5-fold cross-validation          | 10-fold cross-validation |
| <b>Tofacitinib 10 mg BID</b> | 0.50                        | 0.51                             | 0.43                        | 0.38                     | 0.47                             | 0.48                     |
| <b>Tofacitinib 5 mg BID</b>  | 0.50                        | 0.50                             | 0.43                        | 0.38                     | 0.43                             | 0.39                     |
| <b>Placebo</b>               | 0.50                        | 0.50                             | 0.45                        | 0.42                     | 0.55                             | 0.56                     |
| <b>Treatments combined</b>   | 0.50                        | 0.50                             | 0.47                        | 0.46                     | 0.48                             | 0.50                     |

*AUROC* area under the receiver operating characteristic, *BID* twice daily, *LASSO* Least Absolute Shrinkage and Selection Operator,

*PMS* partial Mayo score

<sup>a</sup>Steroid-free remission was defined as a PMS of 0–1 in the absence of corticosteroids

**Table S13** Summary of AUROC values from hypothesis-based logistic regression analyses using a 10-fold cross-validation approach to predict steroid-free remission<sup>a</sup> at week 52 of OCTAVE Sustain applying variable selection

|                              | <b>10-fold cross-validation</b>    |                         |                                         |                         |
|------------------------------|------------------------------------|-------------------------|-----------------------------------------|-------------------------|
|                              | <b>AUROC value (baseline only)</b> |                         | <b>AUROC value (baseline to week 8)</b> |                         |
|                              | <b>PMS</b>                         | <b>Total Mayo score</b> | <b>PMS</b>                              | <b>Total Mayo score</b> |
| <b>Tofacitinib 10 mg BID</b> | 0.57                               | 0.56                    | 0.72                                    | 0.70                    |
| <b>Tofacitinib 5 mg BID</b>  | 0.42                               | 0.42                    | 0.65                                    | 0.62                    |
| <b>Placebo</b>               | 0.38                               | 0.39                    | 0.58                                    | 0.62                    |
| <b>Treatments combined</b>   | 0.64                               | 0.65                    | 0.73                                    | 0.73                    |

*AUROC* area under the receiver operating characteristic, *BID* twice daily, *PMS* partial Mayo score

<sup>a</sup>Steroid-free remission was defined as a PMS of 0–1 in the absence of corticosteroids

**Table S14** Summary of AUROC values from hypothesis-based LASSO logistic regression analyses predicting steroid-free remission<sup>a</sup> at week 52 of OCTAVE Sustain

|                              | <b>Testing set of training-testing split</b> |                         |                                         |                         | <b>k-fold cross-validation</b>     |                         |                                         |                         |                                    |                         |                                         |                         |
|------------------------------|----------------------------------------------|-------------------------|-----------------------------------------|-------------------------|------------------------------------|-------------------------|-----------------------------------------|-------------------------|------------------------------------|-------------------------|-----------------------------------------|-------------------------|
|                              | <b>AUROC value (baseline only)</b>           |                         | <b>AUROC value (baseline to week 8)</b> |                         | <b>AUROC value (baseline only)</b> |                         | <b>AUROC value (baseline to week 8)</b> |                         | <b>AUROC value (baseline only)</b> |                         | <b>AUROC value (baseline to week 8)</b> |                         |
|                              | <b>5-fold</b>                                | <b>10-fold</b>          | <b>5-fold</b>                           | <b>10-fold</b>          | <b>5-fold</b>                      | <b>10-fold</b>          | <b>5-fold</b>                           | <b>10-fold</b>          | <b>5-fold</b>                      | <b>10-fold</b>          | <b>5-fold</b>                           | <b>10-fold</b>          |
|                              | <b>cross-validation</b>                      | <b>cross-validation</b> | <b>cross-validation</b>                 | <b>cross-validation</b> | <b>cross-validation</b>            | <b>cross-validation</b> | <b>cross-validation</b>                 | <b>cross-validation</b> | <b>cross-validation</b>            | <b>cross-validation</b> | <b>cross-validation</b>                 | <b>cross-validation</b> |
|                              | <b>PMS</b>                                   | <b>Total</b>            | <b>PMS</b>                              | <b>Total</b>            | <b>PMS</b>                         | <b>Total</b>            | <b>PMS</b>                              | <b>Total</b>            | <b>PMS</b>                         | <b>Total</b>            | <b>PMS</b>                              | <b>Total</b>            |
|                              |                                              | <b>Mayo</b>             |                                         | <b>Mayo</b>             |                                    | <b>Mayo</b>             |                                         | <b>Mayo</b>             |                                    | <b>Mayo</b>             |                                         | <b>Mayo</b>             |
|                              |                                              | <b>score</b>            |                                         | <b>score</b>            |                                    | <b>score</b>            |                                         | <b>score</b>            |                                    | <b>score</b>            |                                         | <b>score</b>            |
| <b>Tofacitinib 10 mg BID</b> | 0.50                                         | 0.50                    | 0.50                                    | 0.50                    | 0.44                               | 0.44                    | 0.37                                    | 0.37                    | 0.55                               | 0.56                    | 0.58                                    | 0.60                    |
| <b>Tofacitinib 5 mg BID</b>  | 0.50                                         | 0.50                    | 0.50                                    | 0.50                    | 0.41                               | 0.41                    | 0.38                                    | 0.38                    | 0.42                               | 0.44                    | 0.38                                    | 0.43                    |
| <b>Placebo</b>               | 0.50                                         | 0.50                    | 0.50                                    | 0.50                    | 0.44                               | 0.44                    | 0.42                                    | 0.42                    | 0.43                               | 0.44                    | 0.39                                    | 0.42                    |
| <b>Treatments combined</b>   | 0.50                                         | 0.50                    | 0.76                                    | 0.78                    | 0.59                               | 0.56                    | 0.61                                    | 0.60                    | 0.72                               | 0.72                    | 0.72                                    | 0.72                    |

*See footnotes on the next page*

*AUROC* area under the receiver operating characteristic, *BID* twice daily, *LASSO* Least Absolute Shrinkage and Selection Operator,

*PMS* partial Mayo score

<sup>a</sup>Steroid-free remission was defined as a PMS of 0–1 in the absence of corticosteroids



**Table S15** Relative importance of the variables from logistic regression analyses predicting delayed response at week 8 of OCTAVE Open

| <b>Whole set of patients</b>                  |                                             |                                                                |                                             |
|-----------------------------------------------|---------------------------------------------|----------------------------------------------------------------|---------------------------------------------|
| <b>AUROC value (baseline only)</b>            |                                             | <b>AUROC value (baseline to week 8)</b>                        |                                             |
| <b>PMS</b>                                    |                                             |                                                                |                                             |
| <b>Measured values</b>                        | 0.63                                        | 0.76                                                           |                                             |
|                                               | <b>OR point estimates<br/>(95% Wald CI)</b> |                                                                | <b>OR point estimates<br/>(95% Wald CI)</b> |
| Duration of UC, years                         | 1.066<br>(1.021–1.113)                      | PMS                                                            | 0.738<br>(0.598–0.909)                      |
| Medical history of<br>hepatobiliary disorders | 4.803<br>(0.952–24.219)                     | PMS monotonicity from<br>induction study baseline to<br>week 8 | 0.343<br>(0.121–0.977)                      |
| Creatinine, mg/dL                             | 0.121<br>(0.028–0.530)                      | Duration of UC, years                                          | 1.072<br>(1.022–1.124)                      |

*Table continues on the next page*

**Table S15** Relative importance of the variables from logistic regression analyses predicting delayed response at week 8 of OCTAVE Open

(continued)

|                                                                     |                              |
|---------------------------------------------------------------------|------------------------------|
| Basophils, %                                                        | < 0.001<br>(< 0.001–< 0.001) |
| Creatinine, mg/dL                                                   | 0.181<br>(0.038–0.877)       |
| Red blood cell distribution width, 10 <sup>6</sup> /mm <sup>3</sup> | 0.869<br>(0.778–0.969)       |

Differences

–

0.71

|                                                           | <b>OR point estimates<br/>(95% Wald CI)</b> |
|-----------------------------------------------------------|---------------------------------------------|
| Difference in PMS from induction study baseline to week 8 | 0.601<br>(0.470–0.768)                      |

*Table continues on the next page*

**Table S15** Relative importance of the variables from logistic regression analyses predicting delayed response at week 8 of OCTAVE Open

(continued)

|                                                                                           |                         |
|-------------------------------------------------------------------------------------------|-------------------------|
| Duration of UC, years                                                                     | 1.069<br>(1.018–1.122)  |
| Medical history of<br>hepatobiliary disorders                                             | 6.468<br>(1.080–38.739) |
| Difference in gamma<br>glutamyl transferase from<br>induction study baseline to<br>week 8 | 1.033<br>(1.003–1.063)  |

*Table continues on the next page*

**Table S15** Relative importance of the variables from logistic regression analyses predicting delayed response at week 8 of OCTAVE Open

(continued)

---

**Individual partial Mayo subscores**

Measured values

0.66

0.75

|                                               | <b>OR point estimates<br/>(95% Wald CI)</b> |
|-----------------------------------------------|---------------------------------------------|
| Stool frequency subscore                      | 0.657<br>(0.448–0.965)                      |
| Duration of UC, years                         | 1.064<br>(1.019–1.111)                      |
| Medical history of<br>hepatobiliary disorders | 5.162<br>(1.013–26.305)                     |
| Creatinine, mg/dL                             | 0.131<br>(0.029–0.584)                      |

|                                         | <b>OR point estimates<br/>(95% Wald CI)</b> |
|-----------------------------------------|---------------------------------------------|
| Stool frequency subscore                | 0.539<br>(0.371–0.783)                      |
| Physician Global Assessment<br>subscore | 0.631<br>(0.412–0.968)                      |
| Duration of UC, years                   | 1.073<br>(1.025–1.124)                      |
| Basophils, %                            | < 0.001<br>(< 0.001–0.003)                  |

*Table continues on the next page*

**Table S15** Relative importance of the variables from logistic regression analyses predicting delayed response at week 8 of OCTAVE Open

(continued)

Differences

–

|                                                                     |                        |
|---------------------------------------------------------------------|------------------------|
| Red blood cell distribution width, 10 <sup>6</sup> /mm <sup>3</sup> | 0.881<br>(0.793–0.979) |
|---------------------------------------------------------------------|------------------------|

0.71

|                                                                                            | <b>OR point estimates<br/>(95% Wald CI)</b> |
|--------------------------------------------------------------------------------------------|---------------------------------------------|
| Difference in stool frequency subscore from induction study baseline to week 8             | 0.484<br>(0.313–0.747)                      |
| Difference in Physician Global Assessment subscore from induction study baseline to week 8 | 0.588<br>(0.372–0.929)                      |

*Table continues on the next page*

**Table S15** Relative importance of the variables from logistic regression analyses predicting delayed response at week 8 of OCTAVE Open

(continued)

|                                                                                  |                         |
|----------------------------------------------------------------------------------|-------------------------|
| Duration of UC, years                                                            | 1.070<br>(1.019–1.124)  |
| Medical history of hepatobiliary disorders                                       | 5.609<br>(1.020–30.841) |
| Difference in gamma glutamyl transferase from induction study baseline to week 8 | 1.033<br>(1.004–1.064)  |

---

- variable importance not generated due to poor model performance, *AUROC* area under the receiver operating characteristic, *BID* twice daily, *CI* confidence interval, *OR*, odds ratio, *PMS* partial Mayo score, *UC* ulcerative colitis

**Table S16** Summary of AUROC values from logistic regression analyses using a 10-fold cross-validation approach to predict delayed response at week 8 of OCTAVE Open

|                                          | <b>10-fold cross-validation</b>    |                                         |
|------------------------------------------|------------------------------------|-----------------------------------------|
|                                          | <b>AUROC value (baseline only)</b> | <b>AUROC value (baseline to week 8)</b> |
| <b>PMS</b>                               |                                    |                                         |
| Measured values                          | 0.55                               | 0.65                                    |
| Differences                              | –                                  | 0.64                                    |
| <b>Individual partial Mayo subscores</b> |                                    |                                         |
| Measured values                          | 0.54                               | 0.65                                    |
| Differences                              | –                                  | 0.59                                    |

*AUROC* area under the receiver operating characteristic, *PMS* partial Mayo score

**Table S17** Summary of AUROC values from hypothesis-based logistic regression analyses using a 10-fold cross-validation approach to predict delayed response at week 8 of OCTAVE Open and applying variable selection

|                                                   | <b>10-fold cross-validation</b>    |                                         |
|---------------------------------------------------|------------------------------------|-----------------------------------------|
|                                                   | <b>AUROC value (baseline only)</b> | <b>AUROC value (baseline to week 8)</b> |
| <b>PMS and subscores<sup>a</sup></b>              | 0.46                               | 0.64                                    |
| <b>Total Mayo score and subscores<sup>b</sup></b> | 0.45                               | 0.65                                    |

<sup>a</sup>Stool frequency, rectal bleeding, and Physician Global Assessment

<sup>b</sup>Stool frequency, rectal bleeding, endoscopic appearance, and Physician Global Assessment

*AUROC* area under the receiver operating characteristic, *PMS* partial Mayo score
